# Supplementary material
Source: MDPI journal article supplement (https://www.mdpi.com/2073-4352/13/9/1326)
Supplement: s1 [file s1]

## Supplementary Materials

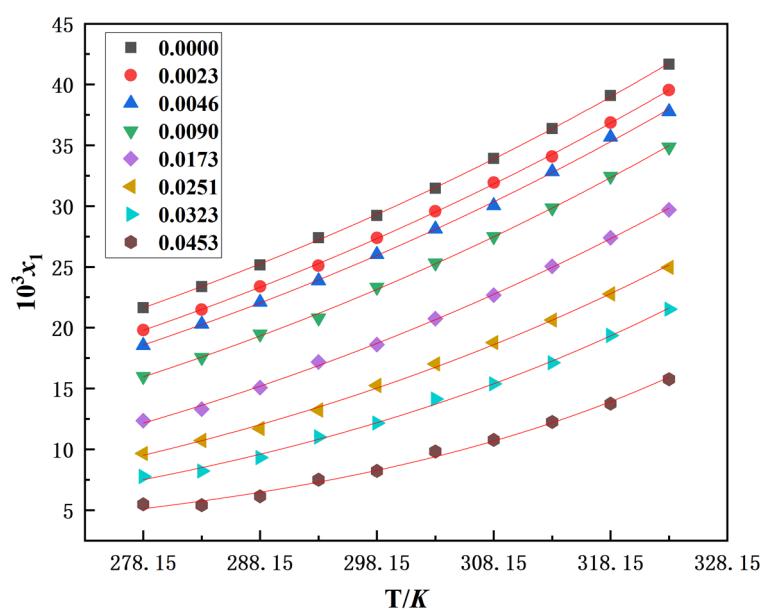

**Figure S1.** Mole fraction solubility of GAH in water with different HCl concentration at the temperature range of 278.15 – 323.15 K.

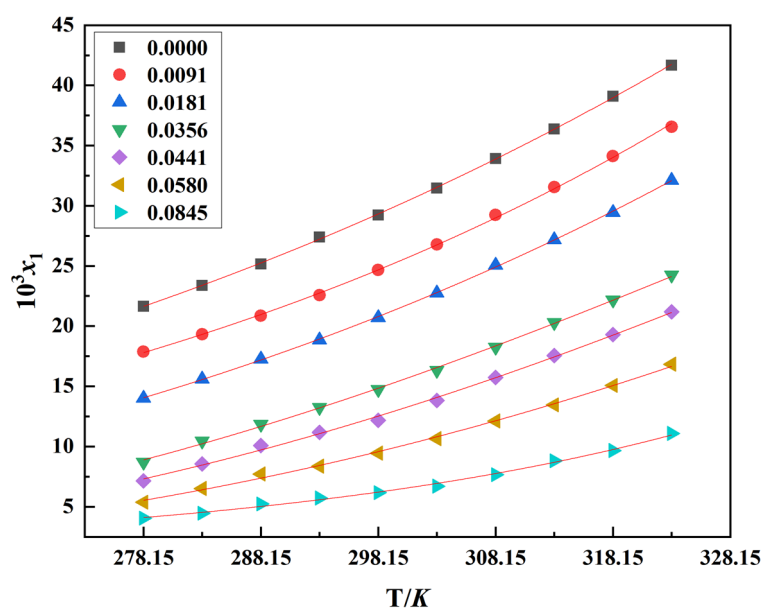

**Figure S2.** Mole fraction solubility of GAH in water with different NaCl concentration at the temperature range of 278.15 – 323.15 K.

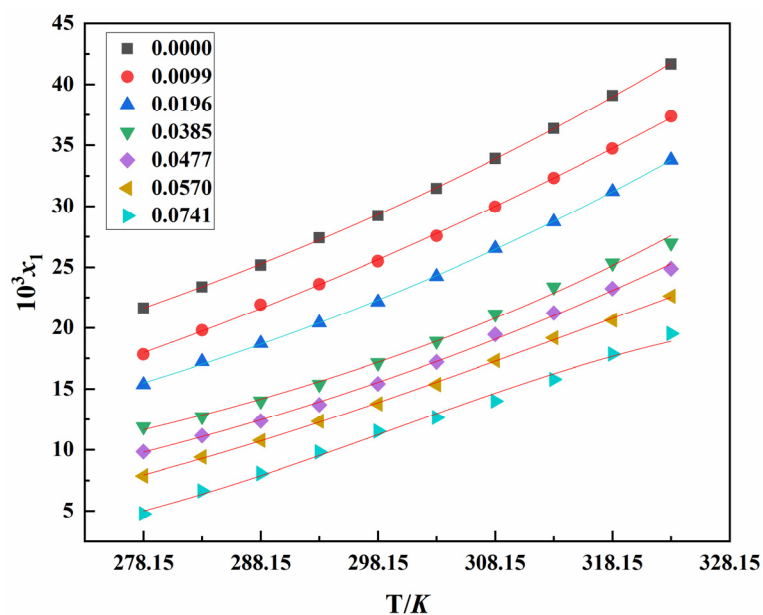

**Figure S3.** Mole fraction solubility of GAH in water with different KCl concentration at the temperature range of 278.15 – 323.15 K.

**Table S1.** The parameters of the modified Apelblat equation when HCl was used as additive.

| $x_{\text{HCl}}$ | $A$       | $B$        | $C$     | 100ARD | 10 <sup>4</sup> RMSD |
|------------------|-----------|------------|---------|--------|----------------------|
| 0.0000           | -30.0501  | 69.4041    | 4.6138  | 0.23   | 0.85                 |
| 0.0023           | -24.0986  | -259.2122  | 3.7504  | 0.24   | 0.93                 |
| 0.0046           | -24.2421  | -293.7924  | 3.7868  | 0.43   | 1.77                 |
| 0.009            | -12.9616  | -921.7216  | 2.1566  | 0.48   | 1.54                 |
| 0.0173           | -0.4631   | -1681.3435 | 0.3727  | 0.84   | 1.65                 |
| 0.0251           | -22.4323  | -836.9988  | 3.6932  | 1.10   | 1.92                 |
| 0.0323           | -56.4759  | 530.3146   | 8.8265  | 1.62   | 2.16                 |
| 0.0453           | -158.9760 | 4961.9079  | 24.1397 | 2.92   | 2.54                 |

**Table S2.** The parameters of the modified Apelblat equation when NaCl was used as additive.

| $x_{\text{NaCl}}$ | $A$      | $B$        | $C$    | 100ARD | 10 <sup>4</sup> RMSD |
|-------------------|----------|------------|--------|--------|----------------------|
| 0.0000            | -30.0501 | 69.4041    | 4.6138 | 0.23   | 0.85                 |
| 0.0091            | -55.4315 | 1076.6280  | 8.4454 | 0.42   | 1.45                 |
| 0.0181            | -11.7476 | -1050.8201 | 2.0007 | 0.31   | 0.80                 |

|        |           |            |          |      |      |
|--------|-----------|------------|----------|------|------|
| 0.0356 | 77.9892   | -5368.5393 | -11.2667 | 0.97 | 1.45 |
| 0.0441 | 67.2600   | -5004.6089 | -9.6277  | 1.41 | 1.98 |
| 0.058  | 45.4350   | -4111.9205 | -6.3698  | 1.43 | 1.55 |
| 0.0845 | -136.6890 | 4211.7183  | 20.6195  | 1.77 | 1.29 |

**Table S3.** The parameters of the modified Apelblat equation when KCl was used as additive.

| $x_{\text{NaCl}}$ | $A$      | $B$         | $C$      | 100ARD | $10^4\text{RMSD}$ |
|-------------------|----------|-------------|----------|--------|-------------------|
| 0.0000            | -30.0501 | 69.4041     | 4.6138   | 0.23   | 0.85              |
| 0.0099            | 8.2118   | -1767.5067  | -1.0440  | 0.44   | 1.39              |
| 0.0196            | -25.6007 | -349.1752   | 4.0313   | 0.41   | 1.04              |
| 0.0385            | -60.0461 | 1037.9438   | 9.2147   | 1.28   | 3.07              |
| 0.0477            | 13.3251  | -2389.0401  | -1.6633  | 0.98   | 2.16              |
| 0.0570            | 135.3340 | -8010.5324  | -19.7880 | 0.73   | 1.17              |
| 0.0741            | 410.9092 | -20822.6142 | -60.6498 | 3.07   | 3.85              |

**Table S4.** The parameters of the van't Hoff equation when HCl was used as additive.

| $x_{\text{HCl}}$ | $\Delta H_d / \text{J}\cdot\text{mol}^{-1}$ | $\Delta S_d / \text{J}\cdot\text{mol}^{-1}\cdot\text{K}^{-1}$ | 100ARD | $10^4\text{RMSD}$ |
|------------------|---------------------------------------------|---------------------------------------------------------------|--------|-------------------|
| 0.0000           | 11003.7495                                  | 7.5998                                                        | 0.50   | 1.59              |
| 0.0023           | 11572.6796                                  | 8.9180                                                        | 0.42   | 1.38              |
| 0.0046           | 11957.8701                                  | 9.7773                                                        | 0.54   | 2.03              |
| 0.0090           | 13073.4560                                  | 12.5584                                                       | 0.49   | 1.56              |
| 0.0173           | 14887.4002                                  | 16.8600                                                       | 0.85   | 1.64              |
| 0.0251           | 16187.9086                                  | 19.4356                                                       | 1.07   | 1.78              |
| 0.0323           | 17756.6785                                  | 22.9905                                                       | 1.80   | 2.21              |
| 0.0453           | 19419.6559                                  | 25.4703                                                       | 3.08   | 2.77              |

**Table S5.** The parameters of the van't Hoff equation when NaCl was used as additive.

| $x_{\text{NaCl}}$ | $\Delta H_d / \text{J}\cdot\text{mol}^{-1}$ | $\Delta S_d / \text{J}\cdot\text{mol}^{-1}\cdot\text{K}^{-1}$ | 100ARD | $10^4\text{RMSD}$ |
|-------------------|---------------------------------------------|---------------------------------------------------------------|--------|-------------------|
| 0.0000            | 11003.7495                                  | 7.5998                                                        | 0.50   | 1.59              |

|        |            |         |      |      |
|--------|------------|---------|------|------|
| 0.0091 | 12249.8338 | 10.3775 | 0.78 | 2.16 |
| 0.0181 | 13768.0463 | 13.9939 | 0.39 | 0.89 |
| 0.0356 | 16272.0681 | 19.4876 | 1.09 | 1.80 |
| 0.0441 | 17352.7218 | 21.7172 | 1.56 | 2.08 |
| 0.0580 | 18179.4683 | 22.2756 | 1.31 | 1.42 |
| 0.0845 | 17032.6556 | 15.0343 | 2.76 | 2.09 |

**Table S6.** The parameters of the van't Hoff equation when KCl was used as additive.

| $x_{\text{KCl}}$ | $\Delta H_d / \text{J}\cdot\text{mol}^{-1}$ | $\Delta S_d / \text{J}\cdot\text{mol}^{-1}\cdot\text{K}^{-1}$ | 100ARD | 10 <sup>4</sup> RMSD |
|------------------|---------------------------------------------|---------------------------------------------------------------|--------|----------------------|
| 0.0000           | 11003.7495                                  | 7.5998                                                        | 0.50   | 1.59                 |
| 0.0099           | 12083.3649                                  | 10.0503                                                       | 0.42   | 1.35                 |
| 0.0196           | 13043.5207                                  | 12.1613                                                       | 0.54   | 1.49                 |
| 0.0385           | 14488.4090                                  | 14.8925                                                       | 1.46   | 2.86                 |
| 0.0477           | 15616.4573                                  | 17.7501                                                       | 0.95   | 2.26                 |
| 0.0570           | 16721.6747                                  | 20.3792                                                       | 1.83   | 2.81                 |
| 0.0741           | 20028.3202                                  | 29.4632                                                       | 4.99   | 5.40                 |
